# Supplementary material
Source: PubMed Central journal article supplement (PMC8262625)
Supplement: NEJMoa2107659_appendix.pdf [file NEJMoa2107659_appendix.pdf]

## Supplementary Appendix

This appendix has been provided by the authors to give readers additional information about their work.

Supplement to: Heath PT, Galiza EP, Baxter DN, et al. Safety and efficacy of NVX-CoV2373 Covid-19 vaccine. N Engl J Med. DOI: 10.1056/NEJMoa2107659

Supplementary Appendix to Manuscript Entitled  
**Safety and Efficacy of NVX-CoV2373 Covid-19 Vaccine**

**Table of Contents**

|                                                                                                                                                                                                                                                                  |    |
|------------------------------------------------------------------------------------------------------------------------------------------------------------------------------------------------------------------------------------------------------------------|----|
| 2019nCoV-302 Study Team Members .....                                                                                                                                                                                                                            | 4  |
| Supplemental Methods .....                                                                                                                                                                                                                                       | 7  |
| Vaccination Pause Rules .....                                                                                                                                                                                                                                    | 7  |
| RT-PCR Testing Assays .....                                                                                                                                                                                                                                      | 8  |
| Swabbing .....                                                                                                                                                                                                                                                   | 8  |
| Recruitment Strategy .....                                                                                                                                                                                                                                       | 8  |
| Influenza Coadministration Sub-Study .....                                                                                                                                                                                                                       | 9  |
| Supplemental Tables and Figure .....                                                                                                                                                                                                                             | 10 |
| Primary Efficacy Endpoint .....                                                                                                                                                                                                                                  | 10 |
| Table S1. Endpoint Definitions of Covid-19 Severity .....                                                                                                                                                                                                        | 10 |
| Table S2. Qualifying Symptoms of Suspected Covid-19 .....                                                                                                                                                                                                        | 11 |
| Unsolicited Adverse Events .....                                                                                                                                                                                                                                 | 12 |
| Table S3. Overall Summary of Unsolicited Adverse Events — Excluding Reactogenicity<br>Adverse Events (Specific Preferred Terms) and Events Reported Post Unblinding or<br>Post Receipt of an Approved or Deployed SARS-CoV-2 Vaccine (Safety Analysis Set) ..... | 12 |
| Table S4. Summary of Unsolicited Treatment-Emergent Adverse Events (Excluding<br>Reactogenicity Adverse Events) Reported in $\geq 1\%$ of Participants in Any Group<br>(Safety Analysis Set) .....                                                               | 13 |
| Efficacy Against UK Variant .....                                                                                                                                                                                                                                | 13 |
| Table S5. Vaccine Efficacy Against PCR-Confirmed Symptomatic Mild, Moderate, or Severe<br>Covid-19 With an Onset at Least 7 Days After Second Study Vaccination in Serologically<br>Negative Adult Participants by SARS-CoV-2 Strain (PP-EFF Analysis Set) ..... | 14 |
| Demographics: Intention-to-Treat Population .....                                                                                                                                                                                                                | 15 |
| Table S6. Demographics and Baseline Characteristics (Intention-to-Treat Analysis Set) .....                                                                                                                                                                      | 15 |
| Table S7. Summary of Unsolicited Serious Treatment-Emergent Adverse Events<br>(Safety Analysis Set) .....                                                                                                                                                        | 16 |
| B1.1.1.7 Variant .....                                                                                                                                                                                                                                           | 18 |

|                                                                             |    |
|-----------------------------------------------------------------------------|----|
| Figure S1. Evolution of Covid-19 Variants During the Endpoint Period .....  | 19 |
| Statistical Method for Efficacy Endpoints .....                             | 19 |
| Interim Analysis .....                                                      | 20 |
| Table S8. Interim and Final Boundaries Using Pocock Spending Function ..... | 21 |
| Table S9. Power Under Various Vaccine Efficacy Assumptions .....            | 21 |
| References .....                                                            | 21 |

## **2019nCoV-302 Study Group Members**

The 2019nCoV-302 clinical trial was a collective group effort across multiple institutions and locations. Below is a list of sites and staff that significantly contributed to the implementation and conduct of the 2019nCoV-302 clinical trial.

| <b>Site</b>                                                                                                                                                      | <b>Investigators</b>                                                                                                                                                                                           |
|------------------------------------------------------------------------------------------------------------------------------------------------------------------|----------------------------------------------------------------------------------------------------------------------------------------------------------------------------------------------------------------|
| Aberdeen Royal Infirmary, NHS Grampian                                                                                                                           | Robin Brittain-Long, Chiara Scicluna, Carole Edwards, Lynn Mackay, Mariella D'Allesandro, Amy Nicol, Karen Norris, Sandra Mann, Heather Lawrence, Ruth Valentine                                               |
| Accelerated Enrollment Solutions                                                                                                                                 | Nick Richards, Helen Price, Bridie Rowbotham, Danielle Bird, Karen Smith, Olga Littler, Kirsty Fielding, Anna Townsend-Rose, Karen Miller, Jessica Davis, Alison Elliot-Garwood, Lauren Trottier, Paul Edwards |
| Belfast Health and Trust                                                                                                                                         | Margaret McFarland                                                                                                                                                                                             |
| Betsi Cadwaladr University Health Board                                                                                                                          | Laura Longshaw, Jane Stockport, Victoria Saul, Alice Thomas, Lynne Grundy                                                                                                                                      |
| Blandford Group Practice                                                                                                                                         | Katharine Lucy Broad                                                                                                                                                                                           |
| Bradford Teaching Hospitals NHS Foundation Trust                                                                                                                 | Karen Regan, Kim Storton, Declan Ryan-Wakeling, Brad Wilson, Malathy Munisamy, John Wright, Anil Shenoy, Beverley English, Lucy Brear                                                                          |
| Centre for Clinical Vaccinology and Tropical Medicine, University of Oxford                                                                                      | Paola Cicconi                                                                                                                                                                                                  |
| Chelsea and Westminster Hospital                                                                                                                                 | Ana Milinkovic, Ruth Byrne, Roya Movahedi, Rosalie Housman                                                                                                                                                     |
| County Durham & Darlington NHS Foundation Trust                                                                                                                  | Naveed Kara, Ellen Brown                                                                                                                                                                                       |
| CRN Thames Valley and South Midlands, Oxford University Hospitals NHS Foundation Trust                                                                           | Helen Collins                                                                                                                                                                                                  |
| Department of Psychiatry, University of Oxford, NIHR Oxford Health Cognitive Health Clinical Research Facility and NIHR Oxford Health Biomedical Research Centre | Andrea Cipriani, Mary-Jane Attenburrow, Katharine A Smith                                                                                                                                                      |
| Dorset Research Hub, Royal Bournemouth Hospital, University Hospitals Dorset NHS Foundation Trust                                                                | Geoff Sparrow                                                                                                                                                                                                  |
| East Suffolk and North Essex NHS Foundation Trust                                                                                                                | Josephine M Rosier, Khalid Saja, Nyasha Nago, Brian Camilleri, Anita Immanuel, Mike Hamblin, Rawlings Osagie, Mahalakshmi Mohan                                                                                |
| Epsom and St Helier University Hospitals NHS Trust                                                                                                               | Hilary Floyd, Suzanne Goddard, Sanjay Mutgi, John Evans, Sean McKeon, Neringa Vilimiene, Rosavic Chicano, Rachel Hayre, Alice Pandaan                                                                          |

|                                                                                                                                                   |                                                                                                                                                                                           |
|---------------------------------------------------------------------------------------------------------------------------------------------------|-------------------------------------------------------------------------------------------------------------------------------------------------------------------------------------------|
| Faculty of Health and Life Sciences, Oxford Brookes University                                                                                    | Catherine Henshall                                                                                                                                                                        |
| Health and Care Research Wales                                                                                                                    | Nicola Williams, Jayne Goodwin                                                                                                                                                            |
| Highcliffe Medical Centre                                                                                                                         | Zelda Cheng                                                                                                                                                                               |
| Keele University                                                                                                                                  | Toby Helliwell, Adrian Chudyk                                                                                                                                                             |
| Kings College London                                                                                                                              | Rafaela Giemza, John Lord Villajin, Noah Yogo, Esther Makanju, Pearl Dulawan, Deepak Nagra, April Buazon, Alice Russell, Georgie Bird                                                     |
| Lakeside Healthcare Research, Lakeside Surgery                                                                                                    | Rex Sarmiento, Balraj Sanghera, Melanie Mullin, Adam Champion, Aisling Bevan, Kinzah Iqbal, Alshia Johnson                                                                                |
| Layton Medical Centre                                                                                                                             | Sarah Shaw, Steven Shaw, Amanda Chalk, Martin Lovatt, Caroline Lillicrap, Angela Parker, Jan Hansel, Zhi Wong, Galvin Gan, Eyad Tuma                                                      |
| Leeds Teaching Hospitals NHS Trust                                                                                                                | Jennifer Murira, Razan Saman, Alistair Hall, Kyra Holliday, Zara Khan, James Calderwood, George Twigg, Helena Baker, Julie Corrigan, Katy Houseman                                        |
| Midlands Partnership NHS Foundation Trust                                                                                                         | Subhra Raguvanshi, Dominic Heining, Jake Weddell, Liz Glaves, Kim Thompson, Francis Davies, Ruth Lambley Burke                                                                            |
| Guy's and St Thomas' NHS Foundation Trust NIHR BRC                                                                                                | Sonia Serrano, Andrea Mazzella, Thurkka Rajeswaran, Moncy Mathew, Karen Bisnauthsing, Laura Bremner, Henry Fok, Franca Morselli, Paola Cinardo, Blair Merrick, Lucy Sowole                |
| NIHR Clinical Research Facility, University Hospital Southampton NHS Foundation Trust                                                             | Lisa Berry                                                                                                                                                                                |
| NIHR Southampton Clinical Research Facility and NIHR Wessex Local Clinical Research Network, University Hospital Southampton NHS Foundation Trust | Mihaela Pacurar, Saul N Faust                                                                                                                                                             |
| NIHR Clinical Research Network, Thames Valley and South Midlands, Oxford University Hospitals NHS Foundation Trust NIHR                           | Nancy Hopewell, Leigh Gerdes, Helen Collins                                                                                                                                               |
| Norfolk and Norwich University Hospital NHS Foundation Trust                                                                                      | Adele Cooper, Jocelyn Keshet-Price, Lou Coke, Melissa Cambell-Kelly, Ketan Dhatariya, Claire Williams , Georgina Marks, James Sudbury, Lisa Rodolico                                      |
| Northern Ireland Clinical Research Facility, Queen's University Belfast and Belfast Health and Social Care Trust                                  | Judy Bradley, Sharon Carr, Roisin Martin, Angelina Madden, Paul Biagioni, Sonia McKenna, Alison Clinton                                                                                   |
| Northern Ireland Clinical Research Network                                                                                                        | Maurice O'Kane                                                                                                                                                                            |
| North Tees and Hartlepool NHS Foundation Trust                                                                                                    | Justin Carter, Matthew Dewhurst, Bill Wetherill                                                                                                                                           |
| Oxford Health NHS Foundation Trust, Warneford Hospital                                                                                            | Jennifer Potts, Sarah McCartney, Katrina Lennon Collins, Marie Chowdhury, Adil Nathoo, Anna Heinen, Orla MacDonald, Claudia Hurducas, Liliana Cifuentes, Thomas Rawlinson, Harjeevan Gill |

|                                                                                                              |                                                                                                                                                                   |
|--------------------------------------------------------------------------------------------------------------|-------------------------------------------------------------------------------------------------------------------------------------------------------------------|
| Quadram Institute                                                                                            | Jane Ewing                                                                                                                                                        |
| Queen Elizabeth University Hospital, NHS Greater Glasgow and Clyde                                           | Guy Mollett, Rachel Blacow, John Haughney, Jonathan MacDonald, John Paul Seenan, Stewart Webb, Colin O'Leary, Scott Muir, Beth White, Neil Ritchie                |
| Queen's University Belfast and Belfast Health and Social Care Trust                                          | Jonathan Stewart                                                                                                                                                  |
| Research and Development, NHS Grampian                                                                       | Chiara Scicluna, Mariella D'Alessandro, Carole Edwards, Lynn MacKay, Amy Nicol, Karen Norris, Heather Lawrence, Sandra Mann, Ruth Valentine                       |
| Royal Bournemouth Hospital, University Hospitals Dorset NHS Foundation Trust                                 | Nicki Lakeman, Laura Purandare                                                                                                                                    |
| Royal Cornwall Hospital NHS Trust                                                                            | David Tucker, Peter Luck, Angharad Everden, Lisa Trembath, Michael Visick, Nick Morley, Laura Reid, Helen Chenoweth, Kirsty Maclean                               |
| Royal Devon and Exeter Hospital                                                                              | Tom Burden, Craig Francis Lunt, Shirley Todd, Stephanie Estcourt, Jasmine Marie Pearce, Suzanne Wilkins, Cathryn Love-Rouse                                       |
| Royal Free London NHS Foundation Trust                                                                       | Eva Torok-Pollok, Mike Youle, Sara Madge, Danielle Solomon, Melissa Chowdhury, Aarti Nandani, Janet North, Nargis Hemat, Suluma Mohamed                           |
| Royal Oldham Hospital, Northern Care Alliance, Greater Manchester                                            | Rachel Newport                                                                                                                                                    |
| Salford Royal Hospital, Northern Care Alliance, Greater Manchester                                           | Chukwuma Chukwu, Olivia Wickens, Vikki O'loughlin, Hema Mistry, Louise Harrison, Robert Oliver, Anne-Marie Peers, Jess Zadik, Katie Doyle                         |
| South Tees Hospitals NHS Foundation Trust                                                                    | Kerry Colling, Caroline Wroe, Marie Branch, Alison Chilvers, Sarah Essex                                                                                          |
| Stafford Town Primary Care Network                                                                           | Mark Stone                                                                                                                                                        |
| Vaccine Institute, St George's University of London & St. George's University Hospitals NHS Foundation Trust | Emily Beales, Olivia Bird, Zsofia Danos, Hazel Fofie, Cecilia Hultin, Sabina Ikram, Fran Mabesa, Aoife Mescall, Josyane Pereira, Jennifer Pearce, Natalina Sutton |
| St Helens and Knowsley Teaching Hospitals NHS Trust                                                          | Emma Snashall                                                                                                                                                     |
| Stockport NHS Foundation Trust, Stepping Hill Hospital                                                       | Sara Bennett, Debbie Suggitt, Kerry Hughes, Wiesia Woodyatt, Lynsey Beacon, Alissa Kent, Chris Cooper, Milan Rudic, Simon Tunstall, Matthew Jackson               |
| Swanage Medical Practice                                                                                     | Claire Hombersley                                                                                                                                                 |
| The Adam Practice                                                                                            | Rebecca Cutts                                                                                                                                                     |
| University College London                                                                                    | Danielle Solomon, Janet M. North                                                                                                                                  |
| University Hospitals of Morecambe Bay NHS Foundation Trust                                                   | Marwan Bukhari, Mohamed Elnaggar, Michelle Glover, Fiona Richardson, Alexandra Dent, Shahzeb Mirza, Rajiv Ark, Jennie Han                                         |

|                                                                                            |                                   |
|--------------------------------------------------------------------------------------------|-----------------------------------|
| University of Exeter Medical School, William Wright House, Royal Devon and Exeter Hospital | Suzy V Hope, Philip J Mitchelmore |
| University of Liverpool                                                                    | Rostam Osanlou, Thomas Heseltine  |

### **Supplemental Methods**

#### *Vaccination Pause Rules*

Study vaccination pause rules based on reactogenicity, adverse events (AEs), and serious adverse events (SAEs) related to study participation were in place to monitor participant safety for the initial set of vaccinations only.

AEs meeting any one of the following criteria resulted in a hold being placed on subsequent study vaccinations pending further review by the safety monitoring committee (SMC) at the direction of the SMC chair:

- Any toxicity grade 3 or higher (severe or potentially life-threatening) solicited (local or systemic) single AE term occurring in  $\geq 10\%$  of participants (after a minimum of 100 subjects are enrolled) in the SARS-CoV-2 rS with Matrix-M1 adjuvant group within the first 7 days after study vaccination.
- Any severe unsolicited single AE preferred term that the investigator assesses as related that occurs in  $\geq 5\%$  of participants (after a minimum of 100 subjects are enrolled) in the NVX2373 group within the first 7 days after study vaccination.

In addition, any SAE assessed as related to vaccine (final assessment by the Sponsor) was reported by the Sponsor to the SMC Chair as soon as possible, and within 24 hours of the Sponsor's awareness of the event. Based on this initial report of the event to the SMC Chair, the Chair could advise the Sponsor to immediately pause enrollment and further dosing in either some or all participants in the study and to convene an ad hoc meeting or make alternative recommendations. The SMC Charter defines processes for how this review occurred and how the Chair's recommendations were documented.

The Sponsor, along with the Medical Monitor, were able to request an SMC review for any safety concerns that arose in the study, even if they were not associated with any specific pause rule, for example, any SAE for which causality was at least possibly related.

### *RT-PCR Testing Assays*

Virological confirmation was performed using polymerase chain reaction (PCR) testing at the United Kingdom (UK) Department of Health and Social Care (DHSC) laboratories, which utilized the TaqPath™ system (Thermo Fisher Scientific, Waltham, Massachusetts, USA). Testing using this system in the UK has shown a close correlation between VOC-202012/1 cases confirmed by genomic sequencing and TaqPath™ PCR results where the spike protein gene PCR target has not been detected but other PCR targets (N gene and ORF1ab gene) have been detected. Such a result is referred to as S gene negative, or S gene target failure (SGTF), is due to a 69–70del that causes a loss of two amino acids at positions 69 and 70, and has a strong association with the B.1.1.7 variant. S gene negative results are therefore used as a proxy for this variant. In the period of time over which endpoint accrual analysis took place (November 2020-January 2021), 95% of all 69–70del sequences reported from UK DHSC laboratories were due to the B.1.1.7 lineage permitting the use of the SGTF result as a proxy marker for this variant during this period.<sup>1,2</sup>

### *Swabbing*

Education and assistance with the self-swab technique were provided at the initial study visit. An online National Health Service (NHS) video guide (<https://www.youtube.com/watch?v=zCqo7MhQT6U>) was also recommended to participants and played at some sites when available. Participants were each given three PCR swab kits after learning the self-swab technique on Day 0. Participants were then asked to self-assess for potential Covid-19 symptoms, with frequent text message reminders, listed in Table S2. A list of the Table S2 symptoms and the site contact number was provided to each participant. Upon assessing any symptom, the participant was asked to call the site to confirm that the symptoms were appropriate to begin self-swabbing. Swabbing was to be performed by participants and swabs mailed to the DHSC testing laboratories. Participants were asked to self-swab daily for 3 days beginning approximately 24 hours after the onset of symptoms. The nose/throat swab involved swabbing the back of the throat for 10 seconds and then swabbing the nose at a depth of approximately 2.5 cm for 10 to 15 seconds. All kits were registered online prior to posting. Participants were directly informed of their results by text or email from the NHS. Sites obtained bar-coded sample results from NHS digital.

### *Recruitment Strategy*

The major method for recruiting potential participants for the NVX-CoV2373 Covid-19 vaccine trial was the NHS COVID-19 vaccine research registry (<https://bepartofresearch.nihr.ac.uk/vaccine-studies/>).



The purpose of this registry is to allow volunteers to be identified by researchers as potentially eligible for their studies. It is an online self-registration service that enables volunteers who are interested in taking part in coronavirus vaccine studies to give their permission for their data to be shared with researchers so that they can be contacted. The registry is open to those who live in the UK, are over 18, and have an email address. In the case of the NVX-CoV2373 Covid-19 vaccine study, registered volunteers who lived in the geographic areas covered by the respective trial sites were sent an email by the registry with a brief summary of the trial and a link to the trial website. If they were interested in learning more about the trial, they could go to the trial website where more information was available. If they then wished to volunteer for the trial, they would complete an online pre-screening questionnaire, and if they had no obvious exclusion criteria, their contact details would be sent to the local trial site that would make direct contact with the volunteers and invite them to a screening/vaccination visit.

#### *Influenza Coadministration Sub-Study*

Participants in the influenza coadministration sub-study were the first approximately 400 participants who met all study entry criteria and additional sub-study criteria, not already having received a 2020-2021 seasonal influenza vaccine and having no prior history of allergy or severe reaction to influenza vaccines. All participants were excluded from receipt of any live vaccine within 4 weeks or any vaccine within 2 weeks of the first dose of study vaccine or placebo coadministered with influenza vaccine. Sub-study enrollment was not randomized or stratified by age.

Participants received a concomitant dose of seasonal influenza vaccine with the first study injection only. This comprised a single intramuscular injection (0.5 mL) of a licensed influenza vaccine in the opposite deltoid to that of the study vaccine or placebo. Although the main study was observer-blinded, the influenza vaccine was administered in an open-label manner.

The study vaccine NVX-CoV2373 consisted of 5- $\mu$ g SARS-CoV-2 rS with 50- $\mu$ g Matrix-M adjuvant. Two influenza vaccines were utilized in the study to comply with Public Health England influenza vaccination recommendation (Flucelvax<sup>®</sup> Quadrivalent, for those 18 to 64 years of age and Fludax<sup>®</sup> for those  $\geq$ 65 years of age).

Reactogenicity was evaluated via an electronic diary for 7 days post-vaccination (local events assessed for study injection only) in addition to monitoring for unsolicited AEs, medically attended AEs (MAAEs),

and SAEs. Influenza hemagglutination inhibition and SARS-CoV-2 anti-spike IgG assays were performed prior to and after co-vaccination.

### **Supplemental Tables and Figure**

#### *Primary Efficacy Endpoint*

The primary efficacy endpoint was the first occurrence of virologically confirmed (by PCR to SARS-CoV-2), symptomatic mild, moderate, or severe Covid-19 (see definitions in Table S1), with onset at least 7 days after second study vaccination in serologically negative (to SARS-CoV-2) participants at baseline.

**Table S1. Endpoint Definitions of Covid-19 Severity**

| Covid-19 Severity | Endpoint Definitions                                                                                                                                                                                                                                                                                                                                                                                                                                                                                                                                                                                                                                                                                                                                                                                                                                                                                                                                                  |
|-------------------|-----------------------------------------------------------------------------------------------------------------------------------------------------------------------------------------------------------------------------------------------------------------------------------------------------------------------------------------------------------------------------------------------------------------------------------------------------------------------------------------------------------------------------------------------------------------------------------------------------------------------------------------------------------------------------------------------------------------------------------------------------------------------------------------------------------------------------------------------------------------------------------------------------------------------------------------------------------------------|
|                   | First episode of PCR-positive nasal swab and $\geq 1$ of symptomatic mild, moderate, or severe Covid-19:                                                                                                                                                                                                                                                                                                                                                                                                                                                                                                                                                                                                                                                                                                                                                                                                                                                              |
| <b>Mild</b>       | Virologically confirmed SARS-CoV-2 infection plus $\geq 1$ of: <ul style="list-style-type: none"> <li>• Fever (defined by subjective or objective measure, regardless of use of anti-pyretic medications)</li> <li>• New onset cough</li> <li>• <math>\geq 2</math> additional Covid-19 symptoms:               <ul style="list-style-type: none"> <li>○ New onset or worsening of shortness of breath or difficulty breathing compared to baseline.</li> <li>○ New onset fatigue.</li> <li>○ New onset generalized muscle or body aches.</li> <li>○ New onset headache.</li> <li>○ New loss of taste or smell.</li> <li>○ Acute onset of sore throat, congestion, or runny nose.</li> <li>○ New onset nausea, vomiting, or diarrhea.</li> </ul> </li> </ul>                                                                                                                                                                                                          |
| <b>Moderate</b>   | <ul style="list-style-type: none"> <li>• High fever (<math>\geq 38.4^\circ\text{C}</math>) for <math>\geq 3</math> days (regardless of use of anti-pyretic medications, need not be contiguous days).</li> <li>• Any evidence of significant lower respiratory tract infection (LRTI):               <ul style="list-style-type: none"> <li>○ Shortness of breath (or breathlessness or difficulty breathing) with or without exertion (greater than baseline).</li> <li>○ Tachypnea: 20 to 29 breaths per minute at rest.</li> <li>○ SpO<sub>2</sub>: 94% to 95% on room air.</li> <li>○ Abnormal chest X-ray or chest computerized tomography (CT) consistent with pneumonia or LRTI.</li> </ul> </li> <li>• Adventitious sounds on lung auscultation (eg, crackles/rales, wheeze, rhonchi, pleural rub, stridor).</li> </ul>                                                                                                                                       |
| <b>Severe</b>     | <ul style="list-style-type: none"> <li>• Tachypnea: <math>\geq 30</math> breaths per minute at rest.</li> <li>• Resting heart rate <math>\geq 125</math> beats per minute.</li> <li>• SpO<sub>2</sub>: <math>\leq 93\%</math> on room air or PaO<sub>2</sub>/FiO<sub>2</sub> <math>&lt; 300</math> mmHg.</li> <li>• High flow oxygen (O<sub>2</sub>) therapy or non-invasive ventilation (NIV)/non-invasive positive pressure ventilation (NIPPV) (eg, continuous positive airway pressure [CPAP] or bilevel positive airway pressure [BiPAP]).</li> <li>• Mechanical ventilation or extracorporeal membrane oxygenation (ECMO).</li> <li>• One or more major organ system dysfunction or failure to be defined by diagnostic testing/clinical syndrome/interventions, including any of the following:               <ul style="list-style-type: none"> <li>○ Acute respiratory failure, including acute respiratory distress syndrome (ARDS).</li> </ul> </li> </ul> |

**Table S1. Endpoint Definitions of Covid-19 Severity**

| Covid-19 Severity | Endpoint Definitions                                                                                                                                                                                                                                                                                                                                                                                                                                                                                                                                                                                                                                          |
|-------------------|---------------------------------------------------------------------------------------------------------------------------------------------------------------------------------------------------------------------------------------------------------------------------------------------------------------------------------------------------------------------------------------------------------------------------------------------------------------------------------------------------------------------------------------------------------------------------------------------------------------------------------------------------------------|
|                   | <ul style="list-style-type: none"> <li>○ Acute renal failure.</li> <li>○ Acute hepatic failure.</li> <li>○ Acute right or left heart failure.</li> <li>○ Septic or cardiogenic shock (with shock defined as systolic blood pressure [SBP] &lt;90 mm Hg OR diastolic blood pressure [DBP] &lt;60 mm Hg).</li> <li>○ Acute stroke (ischemic or hemorrhagic).</li> <li>○ Acute thrombotic event: acute myocardial infarction (AMI), deep vein thrombosis (DVT), pulmonary embolism (PE).</li> <li>○ Requirement for: vasopressors, systemic corticosteroids, or hemodialysis.</li> <li>● Admission to an intensive care unit (ICU).</li> <li>● Death.</li> </ul> |

Abbreviations: AMI = acute myocardial infarction; ARDS = acute respiratory distress syndrome; BiPAP = bi-level positive airway pressure; CPAP = continuous positive air pressure; CT = computed tomography; DBP = diastolic blood pressure; DVT = deep vein thrombosis; ECMO = extracorporeal membrane oxygenation; FiO<sub>2</sub> = fraction of inspired oxygen; ICU = intensive care unit; LRTI = lower respiratory tract infection; NIV = non-invasive ventilation; NIPPV = non-invasive positive pressure ventilation; PAO<sub>2</sub> = partial pressure of oxygen in the alveolus; PE = pulmonary embolism; SBP = systolic blood pressure; SpO<sub>2</sub> = oxygen saturation.

\*Participants with a single vital sign abnormality placing them in the moderate or severe categories must also meet the criteria for mild Covid-19.

Table S2 shows the qualifying symptoms of suspected Covid-19.

**Table S2. Qualifying Symptoms of Suspected Covid-19**

|                                                                                                                                                                                                                                                                                                                                                                                                                                                                                                                                                           |
|-----------------------------------------------------------------------------------------------------------------------------------------------------------------------------------------------------------------------------------------------------------------------------------------------------------------------------------------------------------------------------------------------------------------------------------------------------------------------------------------------------------------------------------------------------------|
| <ul style="list-style-type: none"> <li>● Fever (body temperature &gt;38°C, in the absence of other symptoms) or chills</li> <li>● New onset or worsening of cough compared with baseline</li> <li>● New onset or worsening of shortness of breath or difficulty breathing over baseline</li> <li>● Severe fatigue</li> <li>● New onset generalized muscle or body aches</li> <li>● Headache</li> <li>● New loss of taste or smell</li> <li>● Sore throat</li> <li>● Congestion or runny nose</li> <li>● Nausea or vomiting</li> <li>● Diarrhea</li> </ul> |
|-----------------------------------------------------------------------------------------------------------------------------------------------------------------------------------------------------------------------------------------------------------------------------------------------------------------------------------------------------------------------------------------------------------------------------------------------------------------------------------------------------------------------------------------------------------|

Abbreviations: Covid-19 = coronavirus disease 2019.

### Unsolicited Adverse Events

Unsolicited TEAEs classified as severe, medically attended, serious, leading to vaccination or study discontinuation, potential immune-mediated medical conditions, or adverse events of special interest were reported at similar frequencies between the NVX-CoV2373 and placebo groups (Table S3).

**Table S3. Overall Summary of Unsolicited Adverse Events — Excluding Reactogenicity Adverse Events (Specific Preferred Terms) and Events Reported Post Unblinding or Post Receipt of an Approved or Deployed SARS-CoV-2 Vaccine (Safety Analysis Set)**

| Parameters                                                         | NVX-CoV2373<br>N=7569 |        | Placebo<br>N=7570 |        |
|--------------------------------------------------------------------|-----------------------|--------|-------------------|--------|
|                                                                    | n (%)                 | [E]    | n (%)             | [E]    |
| Any TEAEs                                                          | 1912 (25.3)           | [2916] | 1551 (20.5)       | [2514] |
| Any severe TEAEs                                                   | 76 ( 1.0)             | [92]   | 64 ( 0.8)         | [88]   |
| Any treatment-related TEAEs                                        | 824 (10.9)            | [1071] | 344 ( 4.5)        | [464]  |
| Any severe treatment-related TEAEs                                 | 13 ( 0.2)             | [14]   | 3 (<0.1)          | [3]    |
| Any MAAEs                                                          | 285 ( 3.8)            | [335]  | 295 ( 3.9)        | [355]  |
| Any treatment-related MAAEs                                        | 33 ( 0.4)             | [41]   | 13 ( 0.2)         | [15]   |
| Any serious TEAEs                                                  | 41 ( 0.5)             | [50]   | 41 ( 0.5)         | [50]   |
| Any treatment-related serious TEAEs                                | 1 (<0.1)              | [1]    | 0                 | 0      |
| Any TEAEs leading to vaccination discontinuation                   | 23 ( 0.3)             | [27]   | 22 ( 0.3)         | [43]   |
| Any treatment-related TEAEs leading to vaccination discontinuation | 7 (<0.1)              | [9]    | 8 ( 0.1)          | [9]    |
| Any TEAEs leading to study discontinuation                         | 17 ( 0.2)             | [17]   | 16 ( 0.2)         | [16]   |
| Any treatment-related TEAEs leading to study discontinuation       | 5 (<0.1)              | [5]    | 2 (<0.1)          | [2]    |
| Any PIMMCs                                                         | 5 (<0.1)              | [5]    | 7 (<0.1)          | [7]    |
| Any AESIs: relevant to Covid-19                                    | 8 ( 0.1)              | [12]   | 22 ( 0.3)         | [32]   |

Abbreviations: AESIs = adverse event(s) of special interest; Covid-19 = coronavirus disease 2019; [E] = number of adverse events; MAAE = medically attended adverse event; PIMMC = potential immune-mediated medical conditions; SARS-CoV-2 = severe acute respiratory coronavirus 2; TEAE = treatment-emergent adverse event.

All counts exclude reactogenicity adverse events (selected preferred terms) where the event start date is on the day of either vaccination or within the 6 calendar days that follow either vaccination.

Any event that occurred after unblinding or after receipt of an approved or deployed SARS-CoV-2 vaccine was excluded from the analysis.

Unsolicited TEAEs reported for all participants who received at least one dose of NVX-CoV2373 or placebo during the entire study were predominantly mild or moderate in severity and occurred in 25.4% of participants receiving active vaccine and 20.8% of participants receiving placebo (Table S4). No unsolicited TEAE in the NVX-CoV2373 group occurred at a frequency that was one percentage point higher than in the placebo group. This analysis excludes reactogenicity TEAEs (selected preferred terms) with an event start date on the day of either vaccination or within 6 days after each vaccination.

**Table S4. Summary of Unsolicited Treatment-Emergent Adverse Events (Excluding Reactogenicity Adverse Events) Reported in ≥1% of Participants in Any Group (Safety Analysis Set)**

| <b>System Organ Class<br/>Preferred Term</b>         | <b>NVX-CoV2373<br/>N=7569<br/>n (%)</b> | <b>Placebo<br/>N=7570<br/>n (%)</b> |
|------------------------------------------------------|-----------------------------------------|-------------------------------------|
| Any TEAE                                             | 1925 (25.4)                             | 1574 (20.8)                         |
| General disorders and administration site conditions | 461 ( 6.1)                              | 223 ( 2.9)                          |
| Pain                                                 | 93 ( 1.2)                               | 25 ( 0.3)                           |
| Nervous system disorders                             | 325 ( 4.3)                              | 313 ( 4.1)                          |
| Headache                                             | 109 ( 1.4)                              | 131 ( 1.7)                          |
| Lethargy                                             | 77 ( 1.0)                               | 32 ( 0.4)                           |
| Respiratory, thoracic, and mediastinal disorders     | 305 ( 4.0)                              | 316 ( 4.2)                          |
| Oropharyngeal pain                                   | 114 ( 1.5)                              | 116 ( 1.5)                          |
| Rhinorrhea                                           | 70 ( 0.9)                               | 92 ( 1.2)                           |
| Cough                                                | 66 ( 0.9)                               | 87 ( 1.1)                           |
| Infections and infestations                          | 282 ( 3.7)                              | 328 ( 4.3)                          |
| Musculoskeletal and connective tissue disorders      | 219 ( 2.9)                              | 203 ( 2.7)                          |
| Gastrointestinal disorders                           | 217 ( 2.9)                              | 188 ( 2.5)                          |
| Diarrhea                                             | 82 ( 1.1)                               | 66 ( 0.9)                           |
| Skin and subcutaneous tissue disorders               | 157 ( 2.1)                              | 110 ( 1.5)                          |
| Injury, poisoning, and procedural complications      | 121 ( 1.6)                              | 92 ( 1.2)                           |
| Vascular disorders                                   | 86 ( 1.1)                               | 53 ( 0.7)                           |
| Blood and lymphatic system disorders                 | 72 ( 1.0)                               | 61 ( 0.8)                           |

Abbreviations: MedDRA = *Medical Dictionary for Regulatory Activities*; TEAE = treatment-emergent adverse event.

Overall includes TEAE recorded during the entire study duration. If any solicited AE extended beyond 6 days after vaccination (toxicity grade ≥1), then it was recorded as an unsolicited TEAE with the start date as the 7th day following the relevant study vaccination and followed to resolution. A TEAE is defined as any event not present before exposure to study vaccination or any event already present that worsened in intensity after exposure. At each level of subject summarization, a participant is counted once if the participant reported one or more events.

n represents the number of participants at each level of summarization. Percentages were based on the number of participants in the safety analysis set within each treatment and total.

Adverse events were coded using MedDRA, version 23.1.

System organ class is displayed in descending order of frequency for the total column and then alphabetically.

Within class, preferred term is displayed in descending order of frequency for total and then alphabetically.

### *Efficacy Against UK Variant*

A two-dose regimen of NVX-CoV2373 given 21 days apart was found to be safe and 89.7% effective against symptomatic Covid-19. The timing of accumulated cases in this study allowed for a post hoc assessment of vaccine efficacy against the non-B.1.1.7 strains and the B.1.1.7 variant, which is now circulating widely outside of the UK and is soon expected to be the most prominent strain in the United States.<sup>3</sup> This variant is known to be more transmissible and to be associated with a higher case fatality rate than previous strains,<sup>3</sup> emphasizing the need for an effective vaccine. High vaccine efficacy was demonstrated against the on-B.1.1.7 strains (96.4%) and the B.1.1.7 variant (86.3%) (Table S5). This is

the first vaccine to demonstrate high vaccine efficacy (86.3%) against the B.1.1.7 variant in a phase 3 trial.

**Table S5. Vaccine Efficacy Against PCR-Confirmed Symptomatic Mild, Moderate, or Severe Covid-19 With an Onset at Least 7 Days After Second Study Vaccination in Serologically Negative Adult Participants by SARS-CoV-2 Strain (PP-EFF Analysis Set)**

| Parameter                                           | Final Analysis        |                   |
|-----------------------------------------------------|-----------------------|-------------------|
|                                                     | NVX-CoV2373<br>N=7020 | Placebo<br>N=7019 |
| <b>UK (Kent) Variant Strain (B.1.1.7)</b>           |                       |                   |
| Participants in PP-EFF                              | 7019*                 | 7009*             |
| Participants with first occurrence of event, n (%)  | 8 (0.1)               | 58 (0.8)          |
| Severity of first occurrence, n (%)                 |                       |                   |
| Mild                                                | 1 (<0.1)              | 15 (0.2)          |
| Moderate                                            | 7 (<0.1)              | 39 (0.6)          |
| Severe                                              | 0                     | 4 (<0.1)          |
| Median surveillance time (days)                     | 56                    | 55                |
| Log-linear model using modified Poisson regression  |                       |                   |
| Mean disease incidence rate per year in 1000 people | 4.94                  | 36.11             |
| 95% CI                                              | 2.33, 10.48           | 23.15, 56.32      |
| Relative risk                                       | 0.137                 |                   |
| 95% CI                                              | 0.065, 0.287          |                   |
| Vaccine efficacy (%)                                | 86.3                  |                   |
| 95% CI                                              | 71.3, 93.5            |                   |
| <b>Non-B.1.1.7 Strain</b>                           |                       |                   |
| Participants in PP-EFF                              | 7019*                 | 7009*             |
| Participants with first occurrence of event, n (%)  | 1 (<0.1)              | 28 (0.4)          |
| Severity of first occurrence, n (%)                 |                       |                   |
| Mild                                                | 0                     | 9 (0.1)           |
| Moderate                                            | 1 (<0.1)              | 18 (0.3)          |
| Severe                                              | 0                     | 1 (<0.1)          |
| Median surveillance time (days)                     | 56                    | 56                |
| Log-linear model using modified Poisson regression  |                       |                   |
| Mean disease incidence rate per year in 1000 people | 0.43                  | 12.15             |
| 95% CI                                              | 0.05, 3.79            | 4.23, 34.92       |
| Relative risk                                       | 0.036                 |                   |
| 95% CI                                              | 0.005, 0.262          |                   |
| Vaccine efficacy (%)                                | 96.4                  |                   |
| 95% CI                                              | 73.8, 99.5            |                   |

Abbreviations: CI = confidence interval; Covid-19 = coronavirus disease 2019; NVX CoV2373 = SARS-CoV-2 rS (5 µg) + Matrix-M1 adjuvant (50 µg); PCR = polymerase chain reaction; PP = per-protocol; SARS-CoV-2 = severe acute respiratory syndrome coronavirus 2; SARS-CoV-2 rS = severe acute respiratory syndrome coronavirus 2 recombinant nanoparticle spike protein vaccine.

\*Excludes 1 participant in the NVX-CoV2373 group and 10 participants in the placebo group who had no sequence data for either SARS-CoV-2 strain.

Demographics: Intention-to-Treat Population

**Table S6. Demographics and Baseline Characteristics (Intention-to-Treat Analysis Set)**

| Parameter                                 | NVX-CoV2373<br>N=7569 | Placebo<br>N=7570 | Total<br>N=15,139 |
|-------------------------------------------|-----------------------|-------------------|-------------------|
| Age, yr                                   |                       |                   |                   |
| Median                                    | 55.0                  | 55.0              | 55.0              |
| Range                                     | 18, 84                | 18, 84            | 18, 84            |
| Age group, n (%)                          |                       |                   |                   |
| 18-64 yr                                  | 5503 (72.7)           | 5511 (72.8)       | 11014 (72.8)      |
| ≥65 yr                                    | 2066 (27.3)           | 2059 (27.2)       | 4125 (27.2)       |
| Sex, n (%)                                |                       |                   |                   |
| Male                                      | 3890 (51.4)           | 3918 (51.8)       | 7808 (51.6)       |
| Female                                    | 3679 (48.6)           | 3652 (48.2)       | 7331 (48.4)       |
| Race or ethnic group, n (%)               |                       |                   |                   |
| White                                     | 7127 (94.2)           | 7153 (94.5)       | 14280 (94.3)      |
| Black or African American                 | 31 (0.4)              | 29 (0.4)          | 60 (0.4)          |
| Asian                                     | 230 (3.0)             | 232 (3.1)         | 462 (3.1)         |
| American Indian or Alaska native          | 5 (<0.1)              | 0                 | 5 (<0.1)          |
| Native Hawaiian or other Pacific Islander | 1 (<0.1)              | 0                 | 1 (<0.1)          |
| Multiple                                  | 75 (1.0)              | 61 (0.8)          | 136 (0.9)         |
| Not reported                              | 91 (1.2)              | 85 (1.1)          | 176 (1.2)         |
| Other                                     | 5 (<0.1)              | 6 (<0.1)          | 11 (<0.1)         |
| Missing                                   | 4                     | 4                 | 8                 |
| Hispanic or Latinx                        | 69 (0.9)              | 56 (0.7)          | 125 (0.8)         |
| SARS-CoV-2 serostatus, n (%)              |                       |                   |                   |
| Negative                                  | 7180 (94.9)           | 7182 (94.9)       | 14362 (94.9)      |
| Positive                                  | 330 (4.4)             | 313 (4.1)         | 643 (4.2)         |
| Missing                                   | 59                    | 75                | 134               |
| BMI, kg/m <sup>2</sup> , n (%)            |                       |                   |                   |
| ≥30.0: obese                              | 344 (4.5)             | 353 (4.7)         | 697 (4.6)         |
| Comorbidity status*                       |                       |                   |                   |
| Yes                                       | 3368 (44.5)           | 3399 (44.9)       | 6767 (44.7)       |
| No                                        | 4201 (55.5)           | 4171 (55.1)       | 8372 (55.3)       |

SD = standard deviation. Body mass index (BMI) is calculated as weight (kg) divided by squared height (m).

Percentages are based on per-protocol efficacy analysis set within each treatment and overall.

\*Comorbid subjects are those identified who have at least one of the comorbid conditions reported as a medical history or have a screening BMI value greater than 30 kg/m<sup>2</sup>.

**Table S7. Summary of Unsolicited Serious Treatment-Emergent Adverse Events (Safety Analysis Set)**

| <b>System Organ Class<br/>Preferred Term<br/>Severity</b>                     | <b>NVX-CoV2373<br/>N=7569<br/>n (%)</b> | <b>Placebo<br/>N=7570<br/>n (%)</b> | <b>Total<br/>N=15139<br/>n (%)</b> |
|-------------------------------------------------------------------------------|-----------------------------------------|-------------------------------------|------------------------------------|
| Any Serious TEAE                                                              | 44 ( 0.6)                               | 44 ( 0.6)                           | 88 ( 0.6)                          |
| Infections and infestations                                                   | 6 (<0.1)                                | 11 ( 0.1)                           | 17 ( 0.1)                          |
| Covid-19 pneumonia                                                            | 1 (<0.1)                                | 3 (<0.1)                            | 4 (<0.1)                           |
| Appendicitis                                                                  | 1 (<0.1)                                | 2 (<0.1)                            | 3 (<0.1)                           |
| Covid-19                                                                      | 2 (<0.1)                                | 0                                   | 2 (<0.1)                           |
| Pneumonia                                                                     | 0                                       | 2 (<0.1)                            | 2 (<0.1)                           |
| Appendicitis perforated                                                       | 1 (<0.1)                                | 0                                   | 1 (<0.1)                           |
| Bacterial sepsis                                                              | 0                                       | 1 (<0.1)                            | 1 (<0.1)                           |
| Diverticulitis                                                                | 0                                       | 1 (<0.1)                            | 1 (<0.1)                           |
| Epiglottitis                                                                  | 0                                       | 1 (<0.1)                            | 1 (<0.1)                           |
| Gastroenteritis                                                               | 0                                       | 1 (<0.1)                            | 1 (<0.1)                           |
| Intestinal gangrene                                                           | 1 (<0.1)                                | 0                                   | 1 (<0.1)                           |
| Otitis externa                                                                | 0                                       | 1 (<0.1)                            | 1 (<0.1)                           |
| Pharyngeal abscess                                                            | 0                                       | 1 (<0.1)                            | 1 (<0.1)                           |
| Postoperative wound<br>infection                                              | 1 (<0.1)                                | 0                                   | 1 (<0.1)                           |
| Wound infection                                                               | 1 (<0.1)                                | 0                                   | 1 (<0.1)                           |
| Injury, poisoning, and<br>procedural complications                            | 11 ( 0.1)                               | 6 (<0.1)                            | 17 ( 0.1)                          |
| Ankle fracture                                                                | 3 (<0.1)                                | 0                                   | 3 (<0.1)                           |
| Femoral neck fracture                                                         | 0                                       | 3 (<0.1)                            | 3 (<0.1)                           |
| Cervical vertebral fracture                                                   | 1 (<0.1)                                | 0                                   | 1 (<0.1)                           |
| Fall                                                                          | 0                                       | 1 (<0.1)                            | 1 (<0.1)                           |
| Femur fracture                                                                | 1 (<0.1)                                | 0                                   | 1 (<0.1)                           |
| Intentional overdose                                                          | 1 (<0.1)                                | 0                                   | 1 (<0.1)                           |
| Joint dislocation                                                             | 1 (<0.1)                                | 0                                   | 1 (<0.1)                           |
| Limb injury                                                                   | 1 (<0.1)                                | 0                                   | 1 (<0.1)                           |
| Overdose                                                                      | 0                                       | 1 (<0.1)                            | 1 (<0.1)                           |
| Poisoning deliberate                                                          | 1 (<0.1)                                | 0                                   | 1 (<0.1)                           |
| Radius fracture                                                               | 1 (<0.1)                                | 0                                   | 1 (<0.1)                           |
| Skin laceration                                                               | 1 (<0.1)                                | 0                                   | 1 (<0.1)                           |
| Ulna fracture                                                                 | 1 (<0.1)                                | 0                                   | 1 (<0.1)                           |
| Wrist fracture                                                                | 0                                       | 1 (<0.1)                            | 1 (<0.1)                           |
| Cardiac disorders                                                             | 7 (<0.1)                                | 5 (<0.1)                            | 12 (<0.1)                          |
| Atrioventricular block<br>complete                                            | 1 (<0.1)                                | 1 (<0.1)                            | 2 (<0.1)                           |
| Acute coronary syndrome                                                       | 1 (<0.1)                                | 0                                   | 1 (<0.1)                           |
| Acute myocardial infarction                                                   | 1 (<0.1)                                | 0                                   | 1 (<0.1)                           |
| Angina pectoris                                                               | 0                                       | 1 (<0.1)                            | 1 (<0.1)                           |
| Arrhythmia                                                                    | 0                                       | 1 (<0.1)                            | 1 (<0.1)                           |
| Atrial fibrillation                                                           | 0                                       | 1 (<0.1)                            | 1 (<0.1)                           |
| Atrial flutter                                                                | 0                                       | 1 (<0.1)                            | 1 (<0.1)                           |
| Atrial tachycardia                                                            | 1 (<0.1)                                | 0                                   | 1 (<0.1)                           |
| Cardiac failure acute                                                         | 1 (<0.1)                                | 0                                   | 1 (<0.1)                           |
| Myocardial infarction                                                         | 1 (<0.1)                                | 0                                   | 1 (<0.1)                           |
| Myocarditis                                                                   | 1 (<0.1)                                | 0                                   | 1 (<0.1)                           |
| Palpitations                                                                  | 1 (<0.1)                                | 0                                   | 1 (<0.1)                           |
| Neoplasms benign,<br>malignant, and<br>unspecified (incl cysts and<br>polyps) | 5 (<0.1)                                | 5 (<0.1)                            | 10 (<0.1)                          |
| Breast cancer                                                                 | 2 (<0.1)                                | 0                                   | 2 (<0.1)                           |
| Adenocarcinoma of<br>appendix                                                 | 0                                       | 1 (<0.1)                            | 1 (<0.1)                           |



|                                                      |          |          |          |
|------------------------------------------------------|----------|----------|----------|
| Bladder cancer                                       | 1 (<0.1) | 0        | 1 (<0.1) |
| Glioblastoma                                         | 0        | 1 (<0.1) | 1 (<0.1) |
| Intraductal proliferative breast lesion              | 0        | 1 (<0.1) | 1 (<0.1) |
| Lung neoplasm malignant                              | 1 (<0.1) | 0        | 1 (<0.1) |
| Ovarian cancer                                       | 0        | 1 (<0.1) | 1 (<0.1) |
| Squamous cell carcinoma of skin                      | 1 (<0.1) | 0        | 1 (<0.1) |
| Squamous cell carcinoma of the tongue                | 0        | 1 (<0.1) | 1 (<0.1) |
| Nervous system disorders                             | 5 (<0.1) | 3 (<0.1) | 8 (<0.1) |
| Migraine                                             | 3 (<0.1) | 0        | 3 (<0.1) |
| Lumbar radiculopathy                                 | 0        | 1 (<0.1) | 1 (<0.1) |
| Migraine with aura                                   | 0        | 1 (<0.1) | 1 (<0.1) |
| Presyncope                                           | 1 (<0.1) | 0        | 1 (<0.1) |
| Sciatica                                             | 1 (<0.1) | 0        | 1 (<0.1) |
| Transient ischemic attack                            | 0        | 1 (<0.1) | 1 (<0.1) |
| Gastrointestinal disorders                           | 2 (<0.1) | 4 (<0.1) | 6 (<0.1) |
| Abdominal pain lower                                 | 1 (<0.1) | 0        | 1 (<0.1) |
| Ascites                                              | 0        | 1 (<0.1) | 1 (<0.1) |
| Gastro-esophageal reflux disease                     | 1 (<0.1) | 0        | 1 (<0.1) |
| Intestinal perforation                               | 0        | 1 (<0.1) | 1 (<0.1) |
| Obstructive pancreatitis                             | 0        | 1 (<0.1) | 1 (<0.1) |
| Small intestinal obstruction                         | 0        | 1 (<0.1) | 1 (<0.1) |
| Upper gastrointestinal hemorrhage                    | 1 (<0.1) | 0        | 1 (<0.1) |
| Renal and urinary disorders                          | 2 (<0.1) | 3 (<0.1) | 5 (<0.1) |
| Acute kidney injury                                  | 1 (<0.1) | 1 (<0.1) | 2 (<0.1) |
| Nephrolithiasis                                      | 0        | 1 (<0.1) | 1 (<0.1) |
| Urethral dilatation                                  | 0        | 1 (<0.1) | 1 (<0.1) |
| Urinary retention                                    | 1 (<0.1) | 0        | 1 (<0.1) |
| Metabolism and nutrition disorders                   | 1 (<0.1) | 3 (<0.1) | 4 (<0.1) |
| Dehydration                                          | 1 (<0.1) | 0        | 1 (<0.1) |
| Diabetic ketoacidosis                                | 0        | 1 (<0.1) | 1 (<0.1) |
| Diabetic ketosis                                     | 0        | 1 (<0.1) | 1 (<0.1) |
| Hypoalbuminemia                                      | 0        | 1 (<0.1) | 1 (<0.1) |
| Respiratory, thoracic, and mediastinal disorders     | 1 (<0.1) | 3 (<0.1) | 4 (<0.1) |
| Pulmonary embolism                                   | 1 (<0.1) | 2 (<0.1) | 3 (<0.1) |
| Epistaxis                                            | 0        | 1 (<0.1) | 1 (<0.1) |
| Blood and lymphatic system disorders                 | 0        | 3 (<0.1) | 3 (<0.1) |
| Anemia                                               | 0        | 1 (<0.1) | 1 (<0.1) |
| Hemolytic anemia                                     | 0        | 1 (<0.1) | 1 (<0.1) |
| Iron deficiency anemia                               | 0        | 1 (<0.1) | 1 (<0.1) |
| General disorders and administration site conditions | 2 (<0.1) | 0        | 2 (<0.1) |
| Mass                                                 | 1 (<0.1) | 0        | 1 (<0.1) |
| Non-cardiac chest pain                               | 1 (<0.1) | 0        | 1 (<0.1) |
| Hepatobiliary disorders                              | 1 (<0.1) | 1 (<0.1) | 2 (<0.1) |
| Cholecystitis                                        | 1 (<0.1) | 0        | 1 (<0.1) |
| Liver injury                                         | 0        | 1 (<0.1) | 1 (<0.1) |
| Reproductive system and breast disorders             | 2 (<0.1) | 0        | 2 (<0.1) |
| Endometriosis                                        | 1 (<0.1) | 0        | 1 (<0.1) |

|                                                 |          |          |          |
|-------------------------------------------------|----------|----------|----------|
| Vaginal prolapse                                | 1 (<0.1) | 0        | 1 (<0.1) |
| Vascular disorders                              | 0        | 2 (<0.1) | 2 (<0.1) |
| Hypertension                                    | 0        | 1 (<0.1) | 1 (<0.1) |
| Peripheral ischemia                             | 0        | 1 (<0.1) | 1 (<0.1) |
| Investigations                                  | 0        | 1 (<0.1) | 1 (<0.1) |
| Blood pressure systolic increased               | 0        | 1 (<0.1) | 1 (<0.1) |
| Musculoskeletal and connective tissue disorders | 0        | 1 (<0.1) | 1 (<0.1) |
| Osteoarthritis                                  | 0        | 1 (<0.1) | 1 (<0.1) |
| Pregnancy, puerperium, and perinatal conditions | 1 (<0.1) | 0        | 1 (<0.1) |
| Abortion spontaneous                            | 1 (<0.1) | 0        | 1 (<0.1) |
| Surgical and medical procedures                 | 1 (<0.1) | 0        | 1 (<0.1) |
| Cholecystectomy                                 | 1 (<0.1) | 0        | 1 (<0.1) |
| UNCODED                                         | 1 (<0.1) | 1 (<0.1) | 2 (<0.1) |

Vaccination Dose 1 includes serious TEAE with start date on or after first vaccination dose to end of study or second vaccination dose, whichever occurs earlier. Vaccination Dose 2 includes serious TEAE with start date on or after second vaccination dose to end of study. Overall includes TEAE recorded during the entire study duration. If any solicited AE extended beyond 6 days after vaccination (toxicity grade  $\geq 1$ ), then it is recorded as an unsolicited AE with the start date the 7th day following the relevant study vaccination and followed to resolution.

n represents the number of subjects at each level of summarization. Percentages are based on the number of subjects in the safety analysis set within each treatment and total.

SAEs were coded using MedDRA, version 23.1.

System organ class is displayed in descending order of frequency for the total column and then alphabetically.

Within class, preferred term is displayed in descending order of frequency for total and then alphabetically.

#### ***B1.1.1.7 Variant***

The B.1.1.7 variant was first detected in the UK in September 2020 and has since been found in more than 100 countries. It has 23 mutations in its genetic code; some of these changes have increased its ability to spread. It is estimated that the B.1.1.7 variant is 40% to 70% more transmissible than previously dominant circulating coronavirus variants.<sup>4</sup> Figure S1 shows the growth of the B.1.1.7 variant over the course of the current study in the UK.

**Figure S1. Evolution of Covid-19 Variants During the Endpoint Period.**

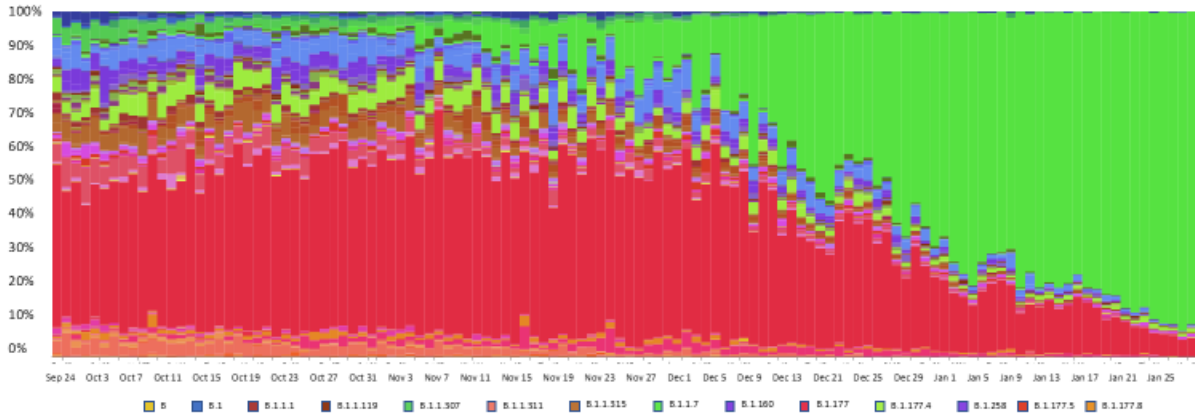

Microreact has been developed by the [Centre for Genomic Pathogen Surveillance](#) at Imperial College London and the Wellcome Genome Campus. Argimón S et al, 2016.<sup>5</sup>

#### *Statistical Method for Efficacy Endpoints*

Summary statistics of a log-linear model using Zou 2004 modified Poisson regression approach<sup>6</sup> on efficacy were presented for relative risk (RR). The vaccine efficacy (VE) was defined as:

$VE (\%) = 100 \times (1 - RR)$  where RR = relative risk of incidence rates between the two treatment groups (SARS-CoV-2 rS/placebo). Mean disease incidence rates were reported as incidence rate per year in 1000 people.

The VE and the corresponding two-sided 95% CI were calculated by modified Poisson regression with robust error variance<sup>6</sup> used to obtain the log RR (estimates) and RR (exponentiated). The one-sided alpha % was calculated using the alpha-spending for Pocock boundary conditions.

The main (hypothesis testing) analysis (i.e., event-driven) for the interim and final analyses for the primary objective was carried out at an overall one-sided Type I error rate of 0.025 for the primary endpoint.

The explanatory variables in the modified Poisson regression model included the treatment group and the stratification variables (region [pooled sites] and age group <65/≥65 years). The pooling of sites into regions was determined and documented prior to breaking the blind. If the model failed to converge,

then the conditional binomial approach using the Clopper Pearson method was used. The robust error variances were estimated using repeated statement and the subject identifier as well as the log of the surveillance time as an offset.

Hypothesis testing for the primary efficacy endpoint was carried out against

$$H_0: VE \leq 30\%$$

$$H_1: VE > 30\%$$

Rejection of the null hypothesis (i.e., alpha-adjusted lower bound confidence interval [LBCI] >30%) was considered meeting the pre-specified study success criterion.

All other efficacy endpoints were analyzed using the same method as the primary efficacy endpoint without adjustment for multiple comparisons (i.e., two-sided alpha 0.05) against  $H_0: VE \leq 0\%$ . Since the successful demonstration of the primary efficacy endpoint was achieved at the interim analysis against the pre-specified success criterion using the adjusted alpha, the primary efficacy endpoint was summarized again using the unadjusted two-sided 95% CI for the estimation purpose using the final data cut.

### *Interim Analysis*

Prior to the final analysis, a single interim analysis of efficacy was planned based on the accumulation of approximately 50% (50 events) of the total anticipated target number of the primary endpoint (100 events). The actual number of events included in the interim analysis was 62 events. The data needed to perform the analysis of the primary efficacy endpoint were cleaned. The interim analysis was performed by an unblinded Biostatistics and Programming team, and the unblinded statistician communicated that the predefined statistical success criterion was fulfilled. The study continued until the final analysis of 100 events while the unblinded Biostatistics and Programming team was isolated (by firewall) from study personnel. The interim analysis followed standard group-sequential design using the Pocock boundary conditions. Table S8 summarizes the timing, number of endpoints, and statistical success boundaries at the planned interim and final analyses. Power calculations were performed by 10,000 simulated trials that were created under various assumptions of VEs, as summarized in Table S9.

**Table S8. Interim and Final Boundaries Using Pocock Spending Function**

| Planned Information Fraction (% of Total Endpoints) | Planned Blinded Total Number of Endpoints | Planned One-Sided Nominal Alpha | VE Boundary for LBCI >30% |
|-----------------------------------------------------|-------------------------------------------|---------------------------------|---------------------------|
| Interim analysis at 50%                             | 50                                        | 0.01550                         | ~68%                      |
| Final analysis at 100%                              | 100                                       | 0.01387                         | ~57%                      |

Abbreviations: LBCI = lower bound confidence interval; VE = vaccine efficacy.

**Table S9. Power Under Various Vaccine Efficacy Assumptions**

| Assumed Vaccine Efficacy | Estimated Power                            |                                   |                                                 |
|--------------------------|--------------------------------------------|-----------------------------------|-------------------------------------------------|
|                          | At Planned Interim Analysis With 50 Events | At Final Analysis With 100 Events | Overall (at Interim Analysis or Final Analysis) |
| 60%                      | 29%                                        | 39%                               | 68%                                             |
| 65%                      | 45%                                        | 41%                               | 87%                                             |
| 70%                      | 64%                                        | 32%                               | 96%                                             |
| 75%                      | 81%                                        | 18%                               | >99%                                            |
| 80%                      | 94%                                        | 6%                                | >99%                                            |
| 85%                      | 99%                                        | 1%                                | >99%                                            |
| 90%                      | >99%                                       | <10%                              | >99%                                            |

Abbreviations: COVID-19 = coronavirus disease 2019; PCR = polymerase chain reaction; SARS-CoV-2 = severe acute respiratory syndrome coronavirus 2.

## References

1. Bal A, Destras G, Gaymard A. Two-step strategy for the identification of SARS-CoV-2 variant of concern 202012/01 and other variants with spike deletion H69-V70, France, August to December 2020. *Euro Surveill* 2021;26:2100008. <https://doi.org/10.2807/1560-7917.ES.2021.26.3.2100008>.
2. Public Health England. Investigation of novel SARS-CoV-2 variant: variant of concern 202012/01. Technical briefing 5. January 14, 2021. [https://assets.publishing.service.gov.uk/government/uploads/system/uploads/attachment\\_data/file/959426/Variant\\_of\\_Concern\\_VOC\\_202012\\_01\\_Technical\\_Briefing\\_5.pdf](https://assets.publishing.service.gov.uk/government/uploads/system/uploads/attachment_data/file/959426/Variant_of_Concern_VOC_202012_01_Technical_Briefing_5.pdf). Accessed May 17, 2021.

3. Centers for Disease Control and Prevention. About variants of the virus that causes Covid-19. Updated April 2, 2021. <https://www.cdc.gov/coronavirus/2019-ncov/transmission/variant.html>. Accessed April 7, 2021.
4. Challen R, Brooks-Pollock E, Read JM, et al. Risk of mortality in patients infected with SARS-CoV-2 variant of concern 202012/1: matched cohort study. *BMJ* 2021;372:n579. <http://dx.doi.org/10.1136/bmj.n579>.
5. Argimón S, Abudahab K, Goater RJE, et al. Microreact: visualizing and sharing data for genomic epidemiology and phylogenetics. *Microb Genom* 2016;2:e000093. <http://dx.doi.org/10.1099/mgen.0.000093>.
6. Zou G. A modified poisson regression approach to prospective studies with binary data. *Am J Epidemiol* 2004;159:702-6. <https://doi.org/10.1093/aje/kwh090>
