# Supplementary material
Source: PubMed Central journal article supplement (PMC8262625)
Supplement: NEJMoa2107659_data-sharing.pdf [file NEJMoa2107659_data-sharing.pdf]

## Data Sharing Statement

Heath PT, Galiza EP, Baxter DN, et al. Safety and Efficacy of NVX-CoV2373 Covid-19 Vaccine. N Engl J Med. DOI: 10.1056/NEJMoa2107659.

| Question                                                            | Authors' Response                                                                                                                                                                                                                                                                               |
|---------------------------------------------------------------------|-------------------------------------------------------------------------------------------------------------------------------------------------------------------------------------------------------------------------------------------------------------------------------------------------|
| Will the data collected for your study be made available to others? | Yes                                                                                                                                                                                                                                                                                             |
| Would you like to offer context for your decision?                  | —                                                                                                                                                                                                                                                                                               |
| Which data?                                                         | Other (e.g., partial data sets)                                                                                                                                                                                                                                                                 |
| Additional information about data                                   | NCT04583995<br><a href="https://clinicaltrials.gov/ct2/show/NCT04583995">https://clinicaltrials.gov/ct2/show/NCT04583995</a><br><a href="https://www.clinicaltrialsregister.eu/ctr-search/trial/2020-004123-16/GB">https://www.clinicaltrialsregister.eu/ctr-search/trial/2020-004123-16/GB</a> |
| How or where can the data be obtained?                              | <a href="https://clinicaltrials.gov/ct2/show/NCT04583995">https://clinicaltrials.gov/ct2/show/NCT04583995</a><br><a href="https://www.clinicaltrialsregister.eu/ctr-search/trial/2020-004123-16/GB">https://www.clinicaltrialsregister.eu/ctr-search/trial/2020-004123-16/GB</a>                |
| When will data availability begin?                                  | With publication                                                                                                                                                                                                                                                                                |
| When will data availability end?                                    | —                                                                                                                                                                                                                                                                                               |
| Will any supporting documents be available?                         | —                                                                                                                                                                                                                                                                                               |
| Which supporting documents?                                         | Analytic/Statistical code                                                                                                                                                                                                                                                                       |
| Additional information about supporting documents                   | —                                                                                                                                                                                                                                                                                               |
| How or where can supporting documents be obtained?                  | —                                                                                                                                                                                                                                                                                               |
| When will supporting documents availability begin?                  | —                                                                                                                                                                                                                                                                                               |
| When will supporting documents availability end?                    | —                                                                                                                                                                                                                                                                                               |
| To whom will data be available?                                     | —                                                                                                                                                                                                                                                                                               |
| For what type of analysis or purpose?                               | —                                                                                                                                                                                                                                                                                               |
| By what mechanism?                                                  | —                                                                                                                                                                                                                                                                                               |
| Any other restrictions?                                             | —                                                                                                                                                                                                                                                                                               |
| Additional information                                              | No                                                                                                                                                                                                                                                                                              |

This statement was posted on June 30, 2021, at NEJM.org.
