# Supplementary material
Source: PubMed Central journal article supplement (PMC8262625)
Supplement: NEJMoa2107659_disclosures.pdf [file NEJMoa2107659_disclosures.pdf]

**Disclosure Purpose:** 21-07659

## Summary of Interests

| Company or Organization                        |            |                                                                                                                                                    |
|------------------------------------------------|------------|----------------------------------------------------------------------------------------------------------------------------------------------------|
| Entity                                         | Type       | Interest Held By                                                                                                                                   |
| <a href="#">Novavax, Inc.</a>                  | Employment | Self                                                                                                                                               |
| <i>Title:</i> Senior Director, Medical Writing |            | <i>Position Description:</i> Responsible for writing clinical documentation in support of regulatory approval of Company investigational products. |
| <i>Additional Information:</i>                 |            |                                                                                                                                                    |

## Additional Questions:

- Are there other relationships or activities that readers could perceive to have influenced, or that give the appearance of potentially influencing, what you wrote in the submitted work?**  
No.
- What is the manuscript title?**  
Safety and Efficacy of the NVX-CoV2373 Covid-19 Vaccine
- Are you the corresponding author?**  
No.

## Certification

I certify that the information provided in this disclosure is complete and accurate.

**Disclosure Purpose:** 21-07659

Summary of Interests

I do not have any interests to disclose at this time.

Additional Questions:

- 1. **Are there other relationships or activities that readers could perceive to have influenced, or that give the appearance of potentially influencing, what you wrote in the submitted work?**  
No.
- 2. **What is the manuscript title?**  
Safety and Efficacy of the NVX-CoV2373 Covid-19 Vaccine
- 3. **Are you the corresponding author?**  
No.

Certification

I certify that the information provided in this disclosure is complete and accurate.

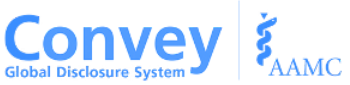

Disclosure Purpose: 21-07659

Summary of Interests

**Company or Organization**

| Entity                                                                                                                                                  | Type             | Interest Held By                                                                |
|---------------------------------------------------------------------------------------------------------------------------------------------------------|------------------|---------------------------------------------------------------------------------|
| <a href="#">GlaxoSmithKline</a>                                                                                                                         | Consultant       | Self                                                                            |
| <i>Category:</i> Consultant<br><i>Additional Information:</i>                                                                                           |                  | <i>Description:</i> COVID monoclonal antibody advisory board and speaker        |
| <a href="#">Roche</a>                                                                                                                                   | Grant / Contract | Self                                                                            |
| <i>Recipient Name:</i> Chelsea and Westminster Hospital<br><i>Grant / Contract Description:</i> Phase II study grant<br><i>Additional Information:</i>  |                  | <i>Recipient Type:</i> Institution<br><i>Grant / Contract Purpose:</i> Research |
| <a href="#">Valneva Austria GmbH</a>                                                                                                                    | Grant / Contract | Self                                                                            |
| <i>Recipient Name:</i> Chelsea and Westminster Hospital<br><i>Grant / Contract Description:</i> Phase III study grant<br><i>Additional Information:</i> |                  | <i>Recipient Type:</i> Institution<br><i>Grant / Contract Purpose:</i> Research |

Additional Questions:

- Are there other relationships or activities that readers could perceive to have influenced, or that give the appearance of potentially influencing, what you wrote in the submitted work?**  
No.
- What is the manuscript title?**  
Safety and Efficacy of the NVX-CoV2373 Covid-19 Vaccine
- Are you the corresponding author?**  
No.

Certification

I certify that the information provided in this disclosure is complete and accurate.

**Disclosure Purpose:** 21-07659

Summary of Interests

I do not have any interests to disclose at this time.

Additional Questions:

- 1. **Are there other relationships or activities that readers could perceive to have influenced, or that give the appearance of potentially influencing, what you wrote in the submitted work?**  
No.
- 2. **What is the manuscript title?**  
Efficacy of the NVX-CoV2373 Covid-19 Vaccine 302
- 3. **Are you the corresponding author?**  
No.

Certification

I certify that the information provided in this disclosure is complete and accurate.



**Disclosure Purpose:** 21-07659

Summary of Interests

I do not have any interests to disclose at this time.

Additional Questions:

- 1. **Are there other relationships or activities that readers could perceive to have influenced, or that give the appearance of potentially influencing, what you wrote in the submitted work?**  
No.
- 2. **What is the manuscript title?**  
Safety and Efficacy of the NVX-CoV2373 Covid-19 Vaccine
- 3. **Are you the corresponding author?**  
No.

Certification

I certify that the information provided in this disclosure is complete and accurate.

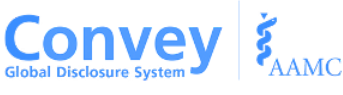

**Disclosure Purpose:** 21-07659

**Summary of Interests**

I do not have any interests to disclose at this time.

**Additional Questions:**

- 1. **Are there other relationships or activities that readers could perceive to have influenced, or that give the appearance of potentially influencing, what you wrote in the submitted work?**  
No.
- 2. **What is the manuscript title?**  
Efficacy of the NVX-CoV2373 Covid-19 Vaccine Against the B.1.1.7 Variant
- 3. **Are you the corresponding author?**  
No.

**Certification**

I certify that the information provided in this disclosure is complete and accurate.



Disclosure Purpose: 21-07659

Summary of Interests

**Company or Organization**

| Entity                                                                        | Type         | Interest Held By                                         |
|-------------------------------------------------------------------------------|--------------|----------------------------------------------------------|
| NVAX                                                                          | Employment   | Self                                                     |
| <i>Title:</i> Vice President, Biostatistics<br><i>Additional Information:</i> |              | <i>Position Description:</i> Head of Biostatistics Group |
| NVAX                                                                          | Stock Option | Self                                                     |
| <i>Additional Information:</i>                                                |              |                                                          |

Additional Questions:

- Are there other relationships or activities that readers could perceive to have influenced, or that give the appearance of potentially influencing, what you wrote in the submitted work?**  
No.
- What is the manuscript title?**  
Safety and Efficacy of the NVX-CoV2373 Covid-19 Vaccine
- Are you the corresponding author?**  
No.

Certification

I certify that the information provided in this disclosure is complete and accurate.

**Disclosure Purpose:** 21-07659

**Summary of Interests**

I do not have any interests to disclose at this time.

**Additional Questions:**

- 1. **Are there other relationships or activities that readers could perceive to have influenced, or that give the appearance of potentially influencing, what you wrote in the submitted work?**  
No.
- 2. **What is the manuscript title?**  
Safety and Efficacy of the NVX-CoV2373 Covid-19 Vaccine
- 3. **Are you the corresponding author?**  
No.

**Certification**

I certify that the information provided in this disclosure is complete and accurate.





**Disclosure Purpose:** 21-07659

Summary of Interests

I do not have any interests to disclose at this time.

Additional Questions:

- 1. **Are there other relationships or activities that readers could perceive to have influenced, or that give the appearance of potentially influencing, what you wrote in the submitted work?**  
No.
- 2. **What is the manuscript title?**  
Efficacy of the NVX-CoV2373 Covid-19 Vaccine
- 3. **Are you the corresponding author?**  
No.

Certification

I certify that the information provided in this disclosure is complete and accurate.

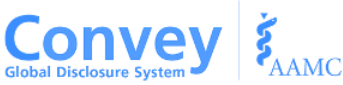

**Disclosure Purpose:** 21-07659

## Summary of Interests

| Company or Organization                                                                                                  |            |                                                       |
|--------------------------------------------------------------------------------------------------------------------------|------------|-------------------------------------------------------|
| Entity                                                                                                                   | Type       | Interest Held By                                      |
| Novavax                                                                                                                  | Employment | Self                                                  |
| <i>Title:</i> Chief Medical Officer<br><i>Additional Information:</i> I am a full-time employee and own stock in Novavax |            | <i>Position Description:</i> Executive Vice-President |

## Additional Questions:

- Are there other relationships or activities that readers could perceive to have influenced, or that give the appearance of potentially influencing, what you wrote in the submitted work?**  
No.
- What is the manuscript title?**  
Safety and Efficacy of the NVX-CoV2373 Covid-19 Vaccine
- Are you the corresponding author?**  
No.

## Certification

I certify that the information provided in this disclosure is complete and accurate.

**Disclosure Purpose:** 21-07659

**Summary of Interests**

I do not have any interests to disclose at this time.

**Additional Questions:**

- 1. **Are there other relationships or activities that readers could perceive to have influenced, or that give the appearance of potentially influencing, what you wrote in the submitted work?**  
No.
- 2. **What is the manuscript title?**  
Safety and Efficacy of the NVX-CoV2373 Covid-19 Vaccine
- 3. **Are you the corresponding author?**  
No.

**Certification**

I certify that the information provided in this disclosure is complete and accurate.

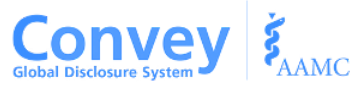

Disclosure Purpose: 21-07659

Summary of Interests

| Company or Organization                         |            |                                              |
|-------------------------------------------------|------------|----------------------------------------------|
| Entity                                          | Type       | Interest Held By                             |
| AbbVie                                          | Consultant | Self                                         |
| Category: Consultant<br>Additional Information: |            | Description: Speaker fees                    |
| Chugai Pharmaceutical                           | Consultant | Self                                         |
| Category: Consultant<br>Additional Information: |            | Description: Speaker fees                    |
| Eli Lilly and Company                           | Consultant | Self                                         |
| Category: Consultant<br>Additional Information: |            | Description: Speaker fees, advisory board    |
| Gilead Sciences                                 | Consultant | Self                                         |
| Category: Consultant<br>Additional Information: |            | Description: Speaker fees and advisory board |
| Janssen Biotech                                 | Consultant | Self                                         |
| Category: Consultant<br>Additional Information: |            | Description: Speaker fees and advisory board |
| Novartis                                        | Consultant | Self                                         |
| Category: Consultant<br>Additional Information: |            | Description: Speaker fees                    |
| Pfizer                                          | Consultant | Self                                         |
| Category: Consultant<br>Additional Information: |            | Description: Speaker fees and advisory board |
| Sobi, Inc                                       | Consultant | Self                                         |
| Category: Consultant<br>Additional Information: |            | Description: Speaker fees                    |

Additional Questions:

- Are there other relationships or activities that readers could perceive to have influenced, or that give the appearance of potentially influencing, what you wrote in the submitted work?  
No.
- What is the manuscript title?  
Safety and Efficacy of the NVX-CoV2373 Covid-19 Vaccine Against the B.1.1.7 Variant
- Are you the corresponding author?  
No.

Certification

I certify that the information provided in this disclosure is complete and accurate.

Disclosure Purpose: 21-07659

Summary of Interests

**Company or Organization**

| Entity                                                                            | Type       | Interest Held By             |
|-----------------------------------------------------------------------------------|------------|------------------------------|
| Novavax, Inc                                                                      | Employment | Self                         |
| <i>Title:</i> President, Research & Development<br><i>Additional Information:</i> |            | <i>Position Description:</i> |
| Novavax, Inc                                                                      | Stock      | Self                         |
| <i>Additional Information:</i> Stakeholder                                        |            |                              |

Additional Questions:

- Are there other relationships or activities that readers could perceive to have influenced, or that give the appearance of potentially influencing, what you wrote in the submitted work?**  
No.
- What is the manuscript title?**  
Safety and Efficacy of the NVX-CoV2373 Covid-19 Vaccine
- Are you the corresponding author?**  
No.

Certification

I certify that the information provided in this disclosure is complete and accurate.

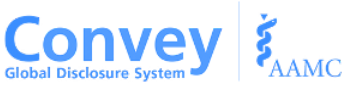

Disclosure Purpose: 21-07659

Summary of Interests

**Company or Organization**

| Entity                                                                     | Type             | Interest Held By                          |
|----------------------------------------------------------------------------|------------------|-------------------------------------------|
| Novavax                                                                    | Grant / Contract | Other - Institution                       |
| <i>Recipient Name:</i> Guys and St Thomas NHS Foundation trust             |                  | <i>Recipient Type:</i> Institution        |
| <i>Grant / Contract Description:</i> Contract to deliver the vaccine trial |                  | <i>Grant / Contract Purpose:</i> Research |
| <i>Additional Information:</i>                                             |                  |                                           |

**Intellectual Property**

| Type                                                                                                                                                                                                                                                                                                                                                      | Is Licensed | Interest Held By                                                            |
|-----------------------------------------------------------------------------------------------------------------------------------------------------------------------------------------------------------------------------------------------------------------------------------------------------------------------------------------------------------|-------------|-----------------------------------------------------------------------------|
| Patent - Long Promoter Patent                                                                                                                                                                                                                                                                                                                             | No          | Self                                                                        |
| <i>Description:</i> Long Promoter Patent<br><i>Patent Status:</i> Issued<br><i>Filing Jurisdiction:</i> GBR<br><i>Licensees:</i>                                                                                                                                                                                                                          |             | <i>Patent Number:</i> OUI3266<br><i>Patent Holder:</i> Previous Institution |
| <i>Additional Information:</i> This is a patent relating to the ChAdOx1 Astra Zeneca vaccine. Oxford University have entered into a partnership with Astra Zeneca and as a named inventor on a patent covering use of a particular promoter technology this may be perceived as a conflict. This technology is not used in the novavax vaccine construct. |             |                                                                             |

Additional Questions:

- Are there other relationships or activities that readers could perceive to have influenced, or that give the appearance of potentially influencing, what you wrote in the submitted work?**  
No.
- What is the manuscript title?**  
Safety and Efficacy of the NVX-CoV2373 Covid-19 Vaccine
- Are you the corresponding author?**  
No.

Certification

I certify that the information provided in this disclosure is complete and accurate.

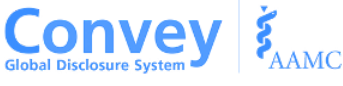

**Disclosure Purpose:** 21-07659

## Summary of Interests

| Company or Organization                                                                                                                         |                  |                                                                                 |
|-------------------------------------------------------------------------------------------------------------------------------------------------|------------------|---------------------------------------------------------------------------------|
| Entity                                                                                                                                          | Type             | Interest Held By                                                                |
| <a href="#">Novavax</a>                                                                                                                         | Grant / Contract | Other - Institution                                                             |
| <i>Recipient Name:</i> St Georges University of London<br><i>Grant / Contract Description:</i> research grant<br><i>Additional Information:</i> |                  | <i>Recipient Type:</i> Institution<br><i>Grant / Contract Purpose:</i> Research |

## Additional Questions:

- Are there other relationships or activities that readers could perceive to have influenced, or that give the appearance of potentially influencing, what you wrote in the submitted work?**  
No.
- What is the manuscript title?**  
Safety and Efficacy of the NVX-CoV2373 Covid-19 Vaccine
- Are you the corresponding author?**  
No.

## Certification

I certify that the information provided in this disclosure is complete and accurate.

**Disclosure Purpose:** 21-07659

Summary of Interests

I do not have any interests to disclose at this time.

Additional Questions:

- 1. **Are there other relationships or activities that readers could perceive to have influenced, or that give the appearance of potentially influencing, what you wrote in the submitted work?**  
No.
- 2. **What is the manuscript title?**  
Safety and Efficacy of the NVX-CoV2373 Covid-19 Vaccine
- 3. **Are you the corresponding author?**  
No.

Certification

I certify that the information provided in this disclosure is complete and accurate.





**Disclosure Purpose:** 21-07659

### Summary of Interests

I do not have any interests to disclose at this time.

### Additional Questions:

- Are there other relationships or activities that readers could perceive to have influenced, or that give the appearance of potentially influencing, what you wrote in the submitted work?**  
No.
- What is the manuscript title?**  
Safety and Efficacy of the NVX-CoV2373 Covid-19 Vaccine
- Are you the corresponding author?**  
No.

### Certification

I certify that the information provided in this disclosure is complete and accurate.

**Disclosure Purpose:** 21-07659

**Summary of Interests**

I do not have any interests to disclose at this time.

**Additional Questions:**

- 1. **Are there other relationships or activities that readers could perceive to have influenced, or that give the appearance of potentially influencing, what you wrote in the submitted work?**  
No.
- 2. **What is the manuscript title?**  
Efficacy of the NVX-CoV2373 Covid-19 Vaccine Against the B.1.1.7 Variant
- 3. **Are you the corresponding author?**  
Yes.
  - a. **Please list the other authors' names here.**  
Dr.Toback

**Certification**

I certify that the information provided in this disclosure is complete and accurate.

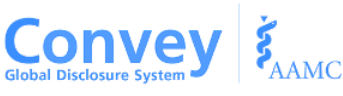

**Disclosure Purpose:** 21-07659

**Summary of Interests**

I do not have any interests to disclose at this time.

**Additional Questions:**

- 1. **Are there other relationships or activities that readers could perceive to have influenced, or that give the appearance of potentially influencing, what you wrote in the submitted work?**  
No.
- 2. **What is the manuscript title?**  
Safety and Efficacy of the NVX-CoV2373 Covid-19 Vaccine
- 3. **Are you the corresponding author?**  
No.

**Certification**

I certify that the information provided in this disclosure is complete and accurate.

**Disclosure Purpose:** 21-07659

### Summary of Interests

I do not have any interests to disclose at this time.

### Additional Questions:

- Are there other relationships or activities that readers could perceive to have influenced, or that give the appearance of potentially influencing, what you wrote in the submitted work?**  
No.
- What is the manuscript title?**  
Safety and Efficacy of the NVX-CoV2373 Covid-19 Vaccine
- Are you the corresponding author?**  
No.

### Certification

I certify that the information provided in this disclosure is complete and accurate.

**Disclosure Purpose:** 21-07659

**Summary of Interests**

I do not have any interests to disclose at this time.

**Additional Questions:**

- 1. **Are there other relationships or activities that readers could perceive to have influenced, or that give the appearance of potentially influencing, what you wrote in the submitted work?**  
No.
- 2. **What is the manuscript title?**  
Safety and Efficacy of the NVX-CoV2373 Covid-19 Vaccine
- 3. **Are you the corresponding author?**  
No.

**Certification**

I certify that the information provided in this disclosure is complete and accurate.

**Disclosure Purpose:** 21-07659

**Summary of Interests**

I do not have any interests to disclose at this time.

**Additional Questions:**

- 1. **Are there other relationships or activities that readers could perceive to have influenced, or that give the appearance of potentially influencing, what you wrote in the submitted work?**  
No.
- 2. **What is the manuscript title?**  
Safety and Efficacy of the NVX-CoV2373 Covid-19 Vaccine
- 3. **Are you the corresponding author?**  
No.

**Certification**

I certify that the information provided in this disclosure is complete and accurate.

Disclosure Purpose: 21-07659

## Summary of Interests

### Company or Organization

| Entity                                                                                                                                         | Type             | Interest Held By                                                                                                 |
|------------------------------------------------------------------------------------------------------------------------------------------------|------------------|------------------------------------------------------------------------------------------------------------------|
| <a href="#">Bayer</a>                                                                                                                          | Consultant       | Self                                                                                                             |
| <i>Category:</i> Consultant<br><i>Additional Information:</i> Intermittent consultancy. £250 per hour                                          |                  | <i>Description:</i> Consultancy for treatment of ARDS                                                            |
| <a href="#">Boehringer Ingelheim</a>                                                                                                           | Consultant       | Self                                                                                                             |
| <i>Category:</i> Consultant<br><i>Additional Information:</i> Intermittent consultancy. £250 per hour                                          |                  | <i>Description:</i> Consultancy for treatment of ARDS and COVID-19                                               |
| <a href="#">Eli Lilly &amp; Co Ltd</a>                                                                                                         | Consultant       | Self                                                                                                             |
| <i>Category:</i> Consultant<br><i>Additional Information:</i> Intermittent consultancy. £220 per hour                                          |                  | <i>Description:</i> Consultancy for treatment of COVID-19                                                        |
| <a href="#">GlaxoSmithKline</a>                                                                                                                | Consultant       | Self                                                                                                             |
| <i>Category:</i> Consultant<br><i>Additional Information:</i> Intermittent consultancy. Currently up to £360 per hour                          |                  | <i>Description:</i> Consultancy for treatments of ARDS and COVID-19 and educational seminar speaker for COVID-19 |
| <a href="#">Novartis Pharma</a>                                                                                                                | Consultant       | Self                                                                                                             |
| <i>Category:</i> Consultant<br><i>Additional Information:</i> £318 per hour                                                                    |                  | <i>Description:</i> Consultancy for treatment of COVID-19                                                        |
| <a href="#">Novavax</a>                                                                                                                        | Grant / Contract | Self                                                                                                             |
| <i>Recipient Name:</i> Prof Danny McAuley<br><i>Grant / Contract Description:</i> Grant for conduct of study<br><i>Additional Information:</i> |                  | <i>Recipient Type:</i> Institution<br><i>Grant / Contract Purpose:</i> Research                                  |
| <a href="#">Vir Biotechnology Inc</a>                                                                                                          | Consultant       | Self                                                                                                             |
| <i>Category:</i> Consultant<br><i>Additional Information:</i> £300 per hour                                                                    |                  | <i>Description:</i> Member DMEC for COVID-19 trial                                                               |

### Additional Questions:

- Are there other relationships or activities that readers could perceive to have influenced, or that give the appearance of potentially influencing, what you wrote in the submitted work?**

No.
- What is the manuscript title?**

Safety and Efficacy of the NVX-CoV2373 Covid-19 Vaccine
- Are you the corresponding author?**

No.

### Certification

I certify that the information provided in this disclosure is complete and accurate.

**Disclosure Purpose:** 21-07659

Summary of Interests

I do not have any interests to disclose at this time.

Additional Questions:

- 1. **Are there other relationships or activities that readers could perceive to have influenced, or that give the appearance of potentially influencing, what you wrote in the submitted work?**  
No.
- 2. **What is the manuscript title?**  
Safety and Efficacy of the NVX-CoV2373 Vaccine
- 3. **Are you the corresponding author?**  
No.

Certification

I certify that the information provided in this disclosure is complete and accurate.

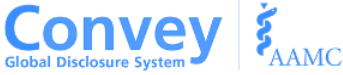



**Disclosure Purpose:** 21-07659

Summary of Interests

I do not have any interests to disclose at this time.

Additional Questions:

- 1. **Are there other relationships or activities that readers could perceive to have influenced, or that give the appearance of potentially influencing, what you wrote in the submitted work?**  
No.
- 2. **What is the manuscript title?**  
Safety and Efficacy of the NVX-CoV2373 Covid-19 Vaccine
- 3. **Are you the corresponding author?**  
No.

Certification

I certify that the information provided in this disclosure is complete and accurate.



**Disclosure Purpose:** 21-07659

**Summary of Interests**

I do not have any interests to disclose at this time.

**Additional Questions:**

- 1. **Are there other relationships or activities that readers could perceive to have influenced, or that give the appearance of potentially influencing, what you wrote in the submitted work?**  
No.
- 2. **What is the manuscript title?**  
Safety and Efficacy of the NVX-CoV2373 Covid-19 Vaccine
- 3. **Are you the corresponding author?**  
No.

**Certification**

I certify that the information provided in this disclosure is complete and accurate.



**Disclosure Purpose:** 21-07659

### Summary of Interests

I do not have any interests to disclose at this time.

### Additional Questions:

- Are there other relationships or activities that readers could perceive to have influenced, or that give the appearance of potentially influencing, what you wrote in the submitted work?**  
No.
- What is the manuscript title?**  
Safety and Efficacy of the NVX-CoV2373 Covid-19 Vaccine
- Are you the corresponding author?**  
No.

### Certification

I certify that the information provided in this disclosure is complete and accurate.

**Disclosure Purpose:** 21-07659

### Summary of Interests

I do not have any interests to disclose at this time.

### Additional Questions:

- Are there other relationships or activities that readers could perceive to have influenced, or that give the appearance of potentially influencing, what you wrote in the submitted work?**  
No.
- What is the manuscript title?**  
Safety and Efficacy of the NVX-CoV2373 Covid-19 Vaccine
- Are you the corresponding author?**  
No.

### Certification

I certify that the information provided in this disclosure is complete and accurate.

**Disclosure Purpose:** 21-07659

**Summary of Interests**

I do not have any interests to disclose at this time.

**Additional Questions:**

- 1. Are there other relationships or activities that readers could perceive to have influenced, or that give the appearance of potentially influencing, what you wrote in the submitted work?**  
No.
- 2. What is the manuscript title?**  
Safety and Efficacy of the NVX-CoV2373 Covid-19 Vaccine
- 3. Are you the corresponding author?**  
No.

**Certification**

I certify that the information provided in this disclosure is complete and accurate.



**Disclosure Purpose:** 21-07659

### Summary of Interests

I do not have any interests to disclose at this time.

### Additional Questions:

- Are there other relationships or activities that readers could perceive to have influenced, or that give the appearance of potentially influencing, what you wrote in the submitted work?**  
No.
- What is the manuscript title?**  
Safety and Efficacy of the NVX-CoV2373 Covid-19 Vaccine
- Are you the corresponding author?**  
No.

### Certification

I certify that the information provided in this disclosure is complete and accurate.

**Disclosure Purpose:** 21-07659

### Summary of Interests

I do not have any interests to disclose at this time.

### Additional Questions:

- Are there other relationships or activities that readers could perceive to have influenced, or that give the appearance of potentially influencing, what you wrote in the submitted work?**  
No.
- What is the manuscript title?**  
Safety and Efficacy of the NVX-CoV2373 Covid-19 Vaccine
- Are you the corresponding author?**  
No.

### Certification

I certify that the information provided in this disclosure is complete and accurate.

Disclosure Purpose: 21-07659

Summary of Interests

**Company or Organization**

| Entity                                    | Type       | Interest Held By             |
|-------------------------------------------|------------|------------------------------|
| Novavax, Inc                              | Employment | Self                         |
| <i>Title:</i> Clinical Research Scientist |            | <i>Position Description:</i> |
| <i>Additional Information:</i>            |            |                              |

Additional Questions:

- Are there other relationships or activities that readers could perceive to have influenced, or that give the appearance of potentially influencing, what you wrote in the submitted work?**  
No.
- What is the manuscript title?**  
Safety and Efficacy of the NVX-CoV2373 Covid-19 Vaccine
- Are you the corresponding author?**  
No.

Certification

I certify that the information provided in this disclosure is complete and accurate.



**Disclosure Purpose:** 21-07659

## Summary of Interests

I do not have any interests to disclose at this time.

## Additional Questions:

- Are there other relationships or activities that readers could perceive to have influenced, or that give the appearance of potentially influencing, what you wrote in the submitted work?**  
No.
- What is the manuscript title?**  
Safety and Efficacy of the NVX-CoV2373 Covid-19 Vaccine
- Are you the corresponding author?**  
No.

## Certification

I certify that the information provided in this disclosure is complete and accurate.

**Disclosure Purpose:** 21-07659

### Summary of Interests

I do not have any interests to disclose at this time.

### Additional Questions:

- Are there other relationships or activities that readers could perceive to have influenced, or that give the appearance of potentially influencing, what you wrote in the submitted work?**  
No.
- What is the manuscript title?**  
Safety and Efficacy of the NVX-CoV2373 Covid-19 Vaccine
- Are you the corresponding author?**  
No.

### Certification

I certify that the information provided in this disclosure is complete and accurate.

**Disclosure Purpose:** 21-07659

**Summary of Interests**

I do not have any interests to disclose at this time.

**Additional Questions:**

- Are there other relationships or activities that readers could perceive to have influenced, or that give the appearance of potentially influencing, what you wrote in the submitted work?**  
No.
- What is the manuscript title?**  
Safety and Efficacy of the NVX-CoV2373 Covid-19 Vaccine
- Are you the corresponding author?**  
No.

**Certification**

I certify that the information provided in this disclosure is complete and accurate.

**Disclosure Purpose:** 21-07659

Summary of Interests

I do not have any interests to disclose at this time.

Additional Questions:

- 1. **Are there other relationships or activities that readers could perceive to have influenced, or that give the appearance of potentially influencing, what you wrote in the submitted work?**  
No.
- 2. **What is the manuscript title?**  
Title: Effects of screening and selective fall prevention interventions for reducing fractures.
- 3. **Are you the corresponding author?**  
No.

Certification

I certify that the information provided in this disclosure is complete and accurate.



**Disclosure Purpose:** 21-07659

## Summary of Interests

| Company or Organization                                                                        |            |                              |
|------------------------------------------------------------------------------------------------|------------|------------------------------|
| Entity                                                                                         | Type       | Interest Held By             |
| <a href="#">Novavax Inc</a>                                                                    | Employment | Self                         |
| <i>Title:</i> Executive Director, Global Safety Medical Lead<br><i>Additional Information:</i> |            | <i>Position Description:</i> |

## Additional Questions:

- Are there other relationships or activities that readers could perceive to have influenced, or that give the appearance of potentially influencing, what you wrote in the submitted work?**  
No.
- What is the manuscript title?**  
Efficacy of the NVX-CoV2373 Covid-19 Vaccine
- Are you the corresponding author?**  
No.

## Certification

I certify that the information provided in this disclosure is complete and accurate.

**Disclosure Purpose:** 21-07659

Summary of Interests

I do not have any interests to disclose at this time.

Additional Questions:

- 1. **Are there other relationships or activities that readers could perceive to have influenced, or that give the appearance of potentially influencing, what you wrote in the submitted work?**  
No.
- 2. **What is the manuscript title?**  
Safety and Efficacy of the NVX-CoV2373 Covid-19 Vaccine
- 3. **Are you the corresponding author?**  
No.

Certification

I certify that the information provided in this disclosure is complete and accurate.

**Disclosure Purpose:** 21-07659

**Summary of Interests**

I do not have any interests to disclose at this time.

**Additional Questions:**

- 1. Are there other relationships or activities that readers could perceive to have influenced, or that give the appearance of potentially influencing, what you wrote in the submitted work?**  
No.
- 2. What is the manuscript title?**  
Safety and Efficacy of the NVX-CoV2373 Covid-19 Vaccine
- 3. Are you the corresponding author?**  
No.

**Certification**

I certify that the information provided in this disclosure is complete and accurate.

**Disclosure Purpose:** 21-07659

Summary of Interests

I do not have any interests to disclose at this time.

Additional Questions:

- 1. **Are there other relationships or activities that readers could perceive to have influenced, or that give the appearance of potentially influencing, what you wrote in the submitted work?**  
No.
- 2. **What is the manuscript title?**  
Safety and efficacy of the NVX-CoV2373 Covid-19 Vaccine
- 3. **Are you the corresponding author?**  
No.

Certification

I certify that the information provided in this disclosure is complete and accurate.





**Disclosure Purpose:** 21-07659

**Summary of Interests**

I do not have any interests to disclose at this time.

**Additional Questions:**

- 1. **Are there other relationships or activities that readers could perceive to have influenced, or that give the appearance of potentially influencing, what you wrote in the submitted work?**  
No.
- 2. **What is the manuscript title?**  
Safety and Efficacy of the NVX-CoV2373 Covid-19 Vaccine
- 3. **Are you the corresponding author?**  
No.

**Certification**

I certify that the information provided in this disclosure is complete and accurate.

Disclosure Purpose: 21-07659

Summary of Interests

**Company or Organization**

| Entity                                                                                                | Type       | Interest Held By                                |
|-------------------------------------------------------------------------------------------------------|------------|-------------------------------------------------|
| Novavax                                                                                               | Employment | Self                                            |
| <i>Title:</i> Vice President Clinical Development<br><i>Additional Information:</i> Salaried employee |            | <i>Position Description:</i> full time employee |
| Novavax                                                                                               | Stock      | Self                                            |
| <i>Additional Information:</i> Stock is a component of my compensation                                |            |                                                 |

Additional Questions:

1. Are there other relationships or activities that readers could perceive to have influenced, or that give the appearance of potentially influencing, what you wrote in the submitted work?

No.

2. What is the manuscript title?

Safety and Efficacy of NVXCoV2373 Covid-19 Vaccine

3. Are you the corresponding author?

Yes.

a. Please list the other authors' names here.

Paul T. Heath<sup>1</sup>, FRCPC, Eva P. Galiza<sup>1</sup>, MBBS, David Neil Baxter<sup>2</sup>, MD, PhD, Marta Boffito<sup>3</sup>, MD, PhD, Duncan Browne<sup>4</sup>, MD, Fiona Burns<sup>5</sup>, PhD, David R. Chadwick<sup>6</sup>, PhD, Rebecca Clark<sup>7</sup>, MBChB, Catherine Cosgrove<sup>1</sup>, PhD, James Galloway<sup>8</sup>, PhD, Anna L. Goodman<sup>9</sup>, DPhil, Amardeep Heer<sup>10</sup>, MBChB, Andrew Higham<sup>11</sup>, PhD, Shalini Iyengar<sup>12</sup>, MBBS, Arham Jamal<sup>13</sup>, MBBCh, Christopher Jeanes<sup>14</sup>, MBBS, Philip A. Kalra<sup>15</sup>, MD, Christina Kyriakidou<sup>16</sup>, MD, Daniel F. McAuley<sup>17</sup>, MD, Agnieszka Meyrick<sup>18</sup>, MD, Angela M. Minassian<sup>19</sup>, DPhil, Jane Minton<sup>20</sup>, PhD, Patrick Moore<sup>21</sup>, BScBM, Imrozia Munsoor<sup>22</sup>, MBBS, Helen Nicholls<sup>23</sup>, MBBCh, Orod Osanlou<sup>24</sup>, MBChB, Jonathan Packham<sup>25</sup>, DM, Carol H. Pretswell<sup>26</sup>, MBChB, Alberto San Francisco Ramos<sup>1</sup>, MB, Dinesh Saralaya<sup>27</sup>, MD, Ray P. Sheridan<sup>28</sup>, MBChB, Richard Smith<sup>29</sup>, PhD, Roy L. Soiza<sup>30</sup>, MBChB, Pauline A. Swift<sup>31</sup>, PhD, Emma C. Thomson<sup>32</sup>, PhD, Jeremy Turner<sup>14</sup>, DPhil (Oxon), Marianne Elizabeth Vijoen<sup>33</sup>, MBChB, Gary Albert<sup>34</sup>, MS, Iksung Cho<sup>34</sup>, MS, Filip Dubovsky<sup>34</sup>, MD, Greg Glenn<sup>34</sup>, MD, Joy Rivers<sup>34</sup>, PhD, Andrea Robertson<sup>34</sup>, MS, Kathy Smith<sup>34</sup>, MD

Certification

I certify that the information provided in this disclosure is complete and accurate.

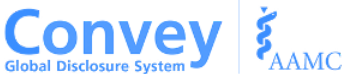

**Disclosure Purpose:** 21-07659

**Summary of Interests**

I do not have any interests to disclose at this time.

**Additional Questions:**

- Are there other relationships or activities that readers could perceive to have influenced, or that give the appearance of potentially influencing, what you wrote in the submitted work?**  
No.
- What is the manuscript title?**  
Safety and Efficacy of the NVX-CoV2373 Covid-19 Vaccine
- Are you the corresponding author?**  
No.

**Certification**

I certify that the information provided in this disclosure is complete and accurate.

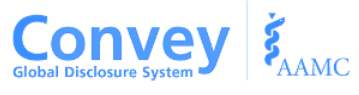

**Disclosure Purpose:** 21-07659

### Summary of Interests

I do not have any interests to disclose at this time.

### Additional Questions:

- Are there other relationships or activities that readers could perceive to have influenced, or that give the appearance of potentially influencing, what you wrote in the submitted work?**  
No.
- What is the manuscript title?**  
Safety and efficacy in the NVXCoV-2373 COVID-19 vaccine
- Are you the corresponding author?**  
No.

### Certification

I certify that the information provided in this disclosure is complete and accurate.
